# Supplementary material
Source: publisher site journal article supplement (https://www.dovepress.com/article/374339)
Supplement: Supplementary file 1 [file get_supplementary_file.php]

| **Supplementary Table 1** Multivariate Cox regression analysis to construct the prediction model of CHD in the training set | | | |
| --- | --- | --- | --- |
| Variables | Multivariate COX regression analysis | | |
| β | HR(95% CI) | *P* value |
| Age | 0.0316 | 1.0321(1.0159-1.0485) | <0.0001 |
| Smoking | 0.6304 | 1.8784(1.3517-2.6102) | 0.0002 |
| Waist circumference | 0.0259 | 1.0263(1.0112-1.0415) | 0.0006 |
| Diabetes | 0.5615 | 1.7533(1.2050-2.5510) | 0.0033 |
| Minimum SaO2 | -0.0170 | 0.9831(0.9686-0.9979) | 0.0251 |

| **Supplementary Table 2** Comparison Nomgram score with China-PAR or with Framingham model | | | |
| --- | --- | --- | --- |
|  | Nomogram model | China-PAR model | Framingham model |
| AUC (95% CI) | 0.699 (0.658, 0.739) | 0.669 (0.624, 0.713) | 0.646 (0.603, 0.689) |
| Sensitivity (%) | 70.185 | 75.300 | 62.317 |
| Specificity (%) | 54.879 | 49.700 | 57.233 |
| IDI | Ref | -0.019(-0.032,-0.007), P＜0.0001 | -0.020(-0.035,-0.008), P＜0.0001 |
| Continuous NRI | Ref | -0.205(-0.315,-0.126), P＜0.0001 | -0.215(-0.336,-0.104), P＜0.0001 |
| AUC: area under the receiver operator characteristic curve; IDI: integrated discrimination improvement index; NRI: net reclassification improvement index. | | | |
|
